# Supplementary material
Source: publisher figshare collection journal article supplement (https://rs.figshare.com/ndownloader/files/13149206)

**ELECTRONIC SUPPLEMENTARY MATERIAL**

**Female control over multiple matings increases the opportunity for postcopulatory sexual selection**

Clelia Gasparini & Jonathan P. Evans

*Proceedings of the Royal Society London B*

DOI: 10.1098/rspb.2018.1505

**Figure S1**

Paternity and time between first and second mating in naturally mated females (NAT treatment). Two females that mated with the second males in two different days are not shown. Average time between first and second mating was 49.7 ± 6.4 min.


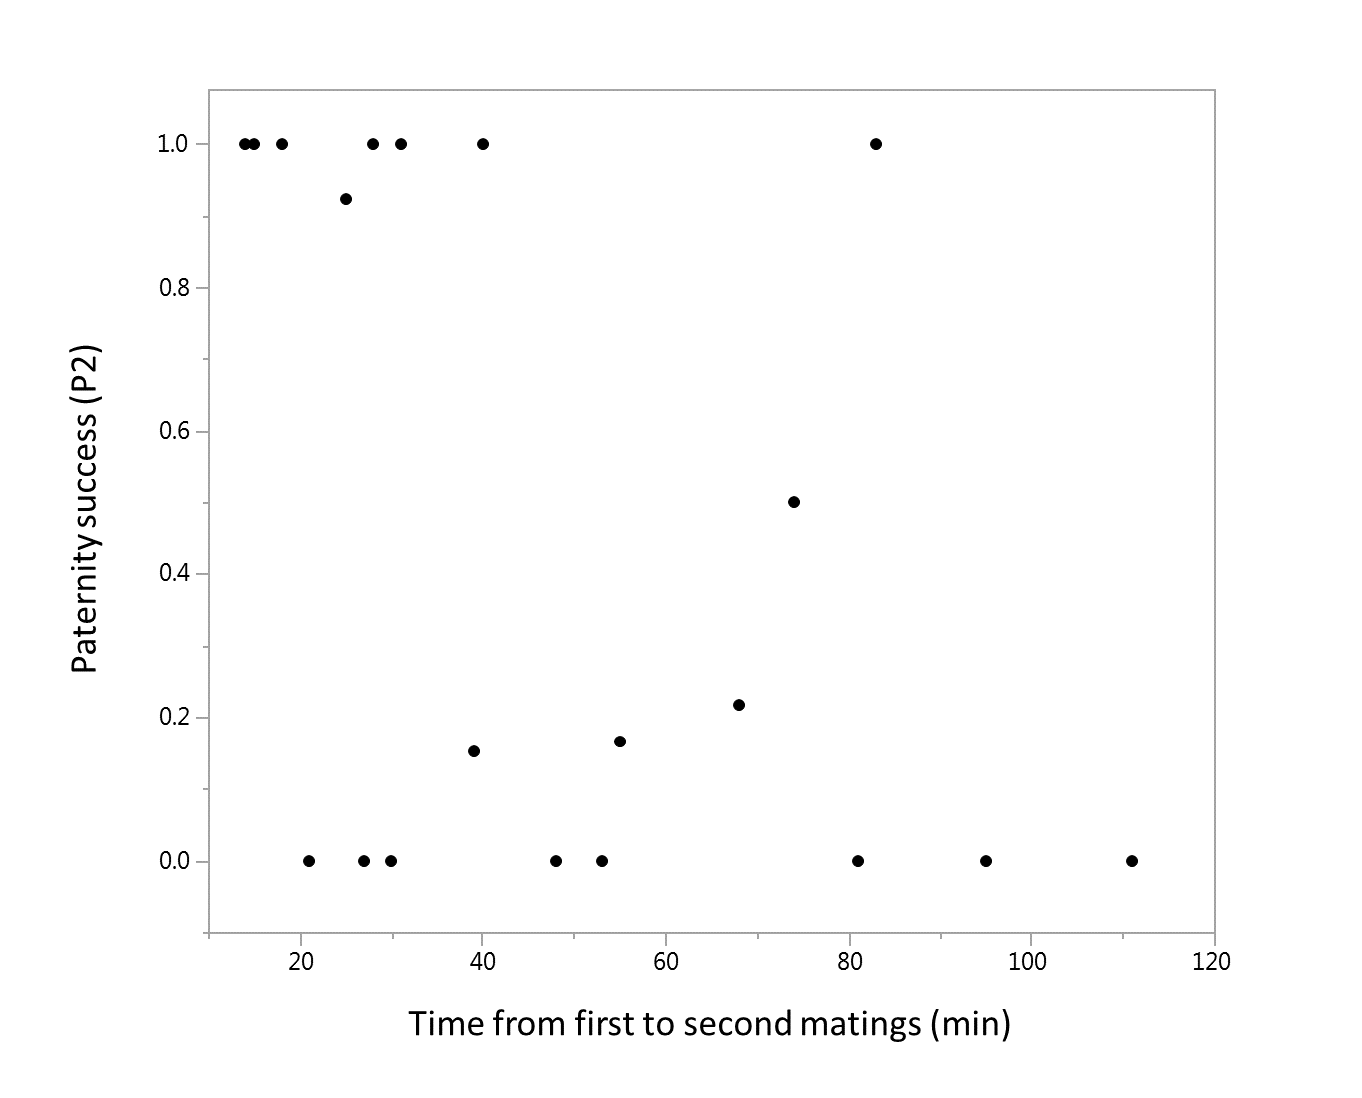


**Figure S2**

Paternity distribution in the successive broods (top panel: 2nd brood, low panel: 3rd brood). Note that from brood no. 4 the number of females producing offspring dropped below ten, and these broods and are not depicted.


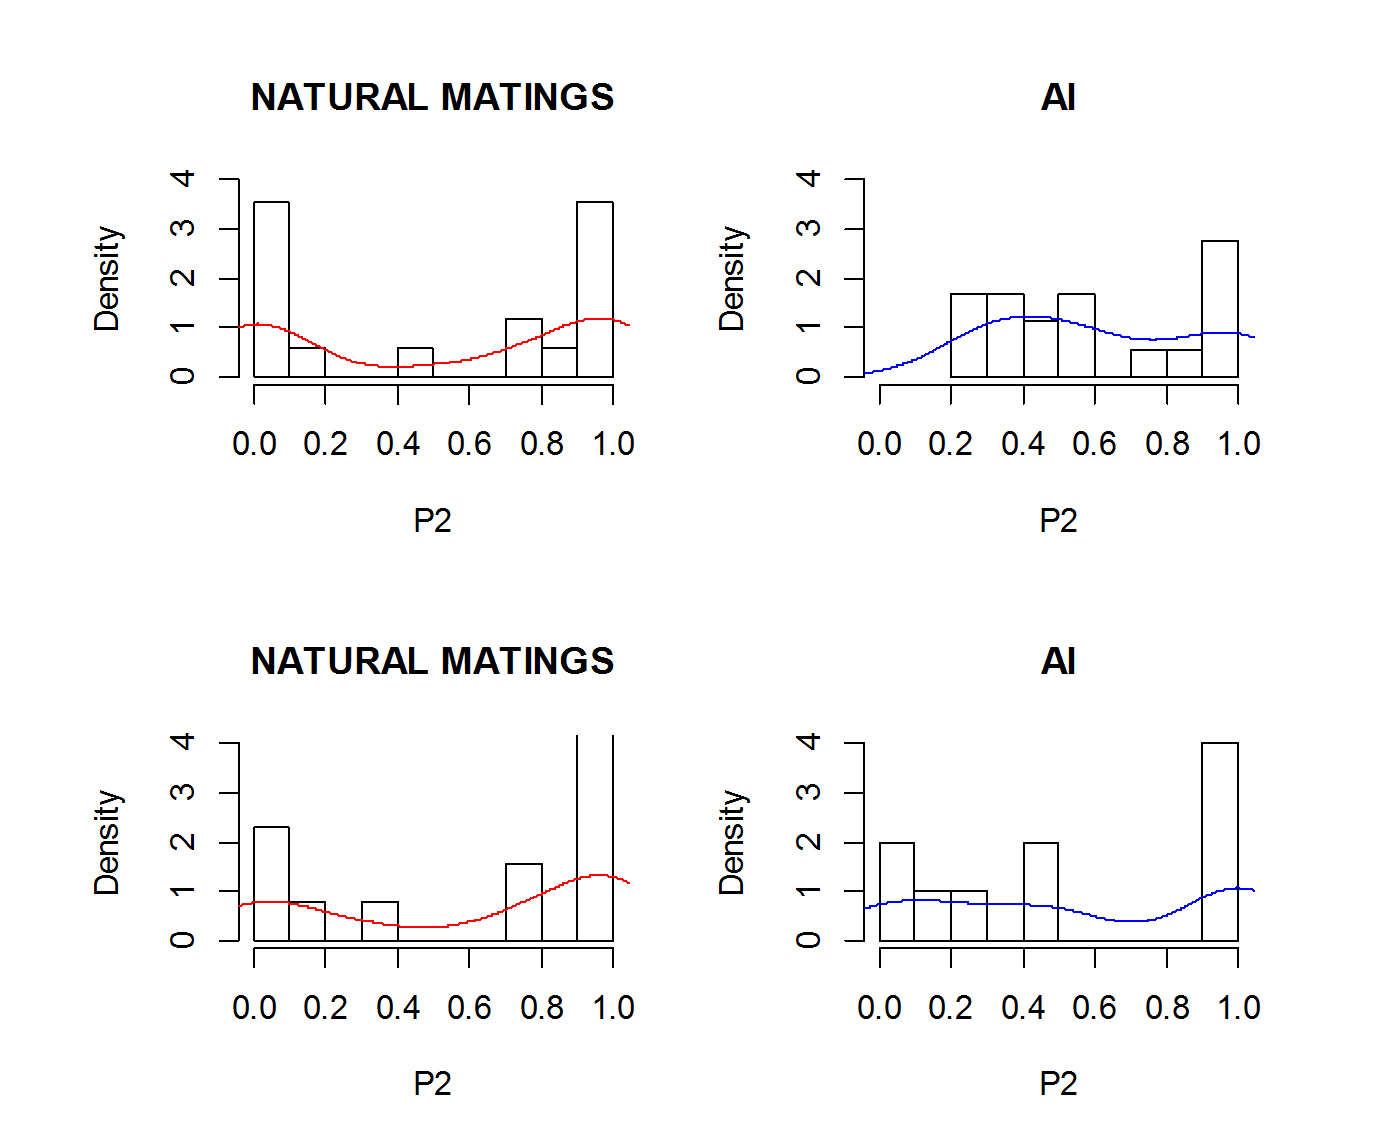

Supplement: Supplementary file 1 [file 13149206]
